# Supplementary material for: Neither ant dominance nor abundance explain ant-plant network structure in Mexican temperate forests
Source: PeerJ. 2020 Dec 7;8:e10435. doi: 10.7717/peerj.10435 (PMC7727367; doi:10.7717/peerj.10435)
Supplement: Table S3 — Raw data of the frequency of the ant-plant interaction matrix in FBST (oak forest and grassland) [file peerj-08-10435-s003.xlsx]

## Sheet: OAK FOREST
	ANTS
PLANTS	PRIM	TETR	LIDI	PHHI	PSPA	PSEU	MOEB	PHNU	CREM
PEME	149	6	1	0	2	1	0	1	0
EUDE	43	15	0	0	0	0	0	0	0
SEMU	32	6	1	0	0	1	0	0	0
SAPO	10	3	0	0	0	0	0	0	0
CAGR	10	0	0	0	0	0	0	0	0
TRDA	7	0	0	0	0	0	0	0	0
MIAC	4	0	2	0	0	0	0	0	0
AGSA	5	0	0	0	0	0	0	0	0
COM1	5	0	0	0	0	0	0	0	0
MEAN	3	0	2	0	0	0	0	0	0
RHST	3	1	1	0	0	0	0	0	0
GNAP	2	1	1	0	0	0	0	0	0
IPO2	3	0	1	0	0	0	0	0	0
IPHE	3	0	1	0	0	0	0	0	0
BASL	2	2	0	0	0	0	0	0	0
BRIN	3	0	0	0	0	0	0	0	0
CYPE	3	0	0	0	0	0	0	0	0
CECA	2	0	0	0	0	0	0	0	0
IPO1	2	0	0	0	0	0	0	0	0
MOCI	0	1	1	0	0	0	0	0	0
OPU1	1	0	0	0	0	0	1	0	0
AGA6	0	0	1	0	0	0	0	0	0
AMDE	1	0	0	0	0	0	0	0	0
AST1	1	0	0	0	0	0	0	0	0
BROM	1	0	0	0	0	0	0	0	0
CAST	1	0	0	0	0	0	0	0	0
COOB	1	0	0	0	0	0	0	0	0
IPST	0	1	0	0	0	0	0	0	0
LILA	1	0	0	0	0	0	0	0	0
AST2	0	0	0	1	0	0	0	0	0
PAEX	1	0	0	0	0	0	0	0	0
QUME	0	0	0	0	0	0	0	0	1
SPFO	0	0	0	1	0	0	0	0	0
VEVI	0	1	0	0	0	0	0	0	0

## Sheet: GRASSLAND
	ANTS
PLANTS	CARU	PSEU	MOEB	PSPA	PHEI	PHTE	PHNU	DOIN	PHHI	TEMN	NYAU	PRIM
AGPO	440	37	5	4	6	2	6	3	0	0	0	0
AGA1	7	0	0	0	0	0	0	0	0	0	0	0
AGA2	6	0	0	0	0	0	0	0	0	0	0	0
AGA3	4	1	0	0	0	0	0	0	0	0	0	0
AGA4	8	0	0	0	0	0	0	0	0	0	0	0
AGA5	2	0	0	0	0	0	0	0	0	0	0	0
AMDE	2	1	0	0	0	0	0	0	0	0	0	0
ASCL	0	0	1	0	0	0	0	0	0	0	0	0
BASA	0	1	0	0	0	0	0	0	0	0	0	0
PEME	5	0	0	0	0	0	0	0	0	0	0	0
COM2	0	0	1	0	0	0	0	0	0	0	1	0
DOVI	1	1	0	0	0	0	0	0	0	0	0	0
EUCA	1	0	0	0	0	0	0	0	0	0	0	0
EUDE	0	0	1	0	0	0	0	0	0	0	0	0
EYPO	8	1	0	0	0	0	0	0	0	0	0	0
EYSE	1	0	0	0	0	0	0	0	0	0	0	0
LORA	2	1	0	0	0	0	0	0	0	0	0	0
MIAC	88	14	1	1	0	0	0	3	0	0	0	0
MOSC	1	0	0	0	0	0	0	0	0	0	0	0
STSE	2	0	0	1	0	0	0	0	0	0	0	0
OPHU	8	5	0	0	0	0	0	1	1	0	0	0
OPU1	23	8	1	1	0	0	1	0	0	0	2	0
OPU2	0	1	0	0	0	0	0	0	0	0	0	0
PAEX	1	0	0	0	0	0	0	0	0	0	0	0
POAC	1	1	0	0	0	0	0	0	0	0	0	2
BASL	65	10	3	0	0	1	0	1	0	1	0	0
SENE	1	1	0	0	0	0	0	0	0	0	0	0
SONI	14	6	0	0	0	0	0	0	0	0	0	0
